# Supplementary material
Source: PubMed Central journal article supplement (PMC7523187)
Supplement: NIHMS1631338-supplement-Supplement_data.pdf [file NIHMS1631338-supplement-Supplement_data.pdf]

## **SUPPLEMENTARY FIGURE LEGEND**

### **Supplementary Figure 1**

**Quantile-quantile plots for the GWAS of (a) EOC and (b) HGSOC.**

Data are shown as observed and expected negative-log p-values.

### **Supplementary Figure 2**

**Manhattan plots for the GWAS of (a) EOC and (b) HGSOC.**

Data are shown as negative-log p-values.

### **Supplementary Figure 3**

**Local association plots for genetic loci reported for EOC in Table 2 near the genes: (a) *AKR1C3*, (b) *LOC101927394*, (c) *UGT2A2*, (d) *WWC1*.**

Data are shown as negative-log p-values.

### **Supplementary Figure 4**

**Local association plots for genetic loci reported for HGSOC in Table 2 near the genes: (a) *FST*, (b) *MAGEC1*, (c) *LOC105376360*, (d) *PRPSAP1*, (e) *GABRG3*, (f) *LOC105377300 / GK2*.**

Data are shown as negative-log p-values.

### **Supplementary Figure 5**

**Results of eQTL analysis in 260 ovarian tissues from AACES participants for selected SNPs from the GWAS of EOC and HGSOC\***

Listed below the figure: \*Boxplots represent the distribution of measured expression versus genotype (rounded to the nearest whole number for imputed dosage variables). P-values are reported from linear models with covariate adjustment for age and two principal components of ancestry.

**Supplementary Table 1: Descriptive statistics for study participants**

| Study Sites                                                                                        | EOC        |             |             | HGSOC      |             |             |
|----------------------------------------------------------------------------------------------------|------------|-------------|-------------|------------|-------------|-------------|
|                                                                                                    | Cases      | Controls    | Total       | Cases      | Controls    | Total       |
|                                                                                                    | n (%)      | n (%)       | n (%)       | n (%)      | n (%)       | n (%)       |
| AAS – African American Cancer Epidemiology Study                                                   | 467 (61.9) | 563 (45.6)  | 1030 (51.8) | 349 (65.0) | 563 (45.6)  | 912 (51.5)  |
| BEL – Belgium Ovarian Cancer Study                                                                 | 0 (0.0)    | 2 (0.2)     | 2 (0.1)     | 0 (0.0)    | 2 (0.2)     | 2 (0.1)     |
| BVU – The BioVU DNA Repository                                                                     | 8 (1.1)    | 98 (7.9)    | 106 (5.3)   | 4 (0.7)    | 98 (7.9)    | 102 (5.8)   |
| CAM – Cancer Research UK, Cambridge Research Institute                                             | 1 (0.1)    | 0 (0.0)     | 1 (0.1)     | 0 (0.0)    | 0 (0.0)     | 0 (0.0)     |
| DKE – Duke University Clinic                                                                       | 7 (0.9)    | 0 (0.0)     | 7 (0.4)     | 3 (0.6)    | 0 (0.0)     | 3 (0.2)     |
| DOV – Diseases of the Ovary and their Evaluation                                                   | 7 (0.9)    | 27 (2.2)    | 34 (1.7)    | 4 (0.7)    | 27 (2.2)    | 31 (1.8)    |
| HAW – Hawaii Ovarian Cancer Study                                                                  | 0 (0.0)    | 3 (0.2)     | 3 (0.2)     | 0 (0.0)    | 3 (0.2)     | 3 (0.2)     |
| HOP – Hormones and Ovarian Cancer Prediction                                                       | 16 (2.1)   | 21 (1.7)    | 37 (1.9)    | 10 (1.9)   | 21 (1.7)    | 31 (1.8)    |
| LAX – Women's Cancer Program at the Samuel Oschin Comprehensive Cancer Institute                   | 18 (2.4)   | 0 (0.0)     | 18 (0.9)    | 15 (2.8)   | 0 (0.0)     | 15 (0.9)    |
| MAY – Mayo Clinic Ovarian Cancer Case-Control Study                                                | 3 (0.4)    | 5 (0.4)     | 8 (0.4)     | 2 (0.4)    | 5 (0.4)     | 7 (0.4)     |
| MEC – Multiethnic Cohort Study                                                                     | 10 (1.3)   | 13 (1.1)    | 23 (1.2)    | 6 (1.1)    | 13 (1.1)    | 19 (1.1)    |
| MOF – Moffitt Cancer Center Ovarian Cancer Study                                                   | 16 (2.1)   | 14 (1.1)    | 30 (1.5)    | 13 (2.4)   | 14 (1.1)    | 27 (1.5)    |
| MSK – Memorial Sloan Kettering Cancer Center                                                       | 8 (1.1)    | 20 (1.6)    | 28 (1.4)    | 8 (1.5)    | 20 (1.6)    | 28 (1.6)    |
| NCO – North Carolina Ovarian Cancer Study                                                          | 108 (14.3) | 160 (13.0)  | 268 (13.5)  | 76 (14.2)  | 160 (13.0)  | 236 (13.3)  |
| NEC – New England Case-Control Study of Ovarian Cancer                                             | 6 (0.8)    | 5 (0.4)     | 11 (0.6)    | 6 (1.1)    | 5 (0.4)     | 11 (0.6)    |
| NHS – Nurses' Health Study I and II                                                                | 3 (0.4)    | 0 (0.0)     | 3 (0.2)     | 3 (0.6)    | 0 (0.0)     | 3 (0.2)     |
| NOR – University of Bergen, Haukeland University Hospital, Norway                                  | 1 (0.1)    | 0 (0.0)     | 1 (0.1)     | 0 (0.0)    | 0 (0.0)     | 0 (0.0)     |
| NTH – Nijmegen Ovarian Cancer Study                                                                | 1 (0.1)    | 0 (0.0)     | 1 (0.1)     | 0 (0.0)    | 0 (0.0)     | 0 (0.0)     |
| ORE – Oregon Ovarian Cancer Registry                                                               | 1 (0.1)    | 0 (0.0)     | 1 (0.1)     | 1 (0.2)    | 0 (0.0)     | 1 (0.1)     |
| OVA – Ovarian Cancer in Alberta and British Columbia                                               | 1 (0.1)    | 0 (0.0)     | 1 (0.1)     | 0 (0.0)    | 0 (0.0)     | 0 (0.0)     |
| PLC –Prostate-Lung-Colorectal and Ovarian Cancer Screening Trial                                   | 5 (0.7)    | 85 (6.9)    | 90 (4.6)    | 2 (0.4)    | 85 (6.9)    | 87 (4.9)    |
| RMH – Royal Marsden Hospital Ovarian Cancer Study                                                  | 1 (0.1)    | 0 (0.0)     | 1 (0.1)     | 1 (0.2)    | 0 (0.0)     | 1 (0.1)     |
| RPC – Roswell Park Cancer Institute Ovarian Cancer Cohort                                          | 4 (0.5)    | 0 (0.0)     | 4 (0.2)     | 3 (0.6)    | 0 (0.0)     | 3 (0.2)     |
| SEA – UK Studies of Epidemiology and Risk Factors in Cancer Heredity (SEARCH) Ovarian Cancer Study | 2 (0.3)    | 1 (0.1)     | 3 (0.2)     | 1 (0.2)    | 1 (0.1)     | 2 (0.1)     |
| SIS – The Sister Study                                                                             | 8 (1.1)    | 131 (10.6)  | 139 (7.0)   | 3 (0.6)    | 131 (10.6)  | 134 (7.6)   |
| SOC – Southampton Ovarian Cancer Study                                                             | 1 (0.1)    | 0 (0.0)     | 1 (0.1)     | 0 (0.0)    | 0 (0.0)     | 0 (0.0)     |
| STA – Genetic Epidemiology of Ovarian Cancer                                                       | 12 (1.6)   | 45 (3.6)    | 57 (2.9)    | 4 (0.7)    | 45 (3.6)    | 49 (2.8)    |
| UCI – UC Irvine Ovarian Cancer Study                                                               | 0 (0.0)    | 2 (0.2)     | 2 (0.1)     | 0 (0.0)    | 2 (0.2)     | 2 (0.1)     |
| UHN – Princess Margaret Cancer Centre                                                              | 4 (0.5)    | 0 (0.0)     | 4 (0.2)     | 2 (0.4)    | 0 (0.0)     | 2 (0.1)     |
| UKO – UK Ovarian Cancer Population Study                                                           | 4 (0.5)    | 10 (0.8)    | 14 (0.7)    | 2 (0.4)    | 10 (0.8)    | 12 (0.7)    |
| USC – Los Angeles County Case-Control Studies of Ovarian Cancer                                    | 31 (4.1)   | 30 (2.4)    | 61 (3.1)    | 18 (3.4)   | 30 (2.4)    | 48 (2.7)    |
| WMH – Westmead Institute for Cancer Research – Westmead Hospital                                   | 1 (0.1)    | 0 (0.0)     | 1 (0.1)     | 1 (0.1)    | 0 (0.0)     | 1 (0.1)     |
| <b>TOTAL</b>                                                                                       | <b>755</b> | <b>1235</b> | <b>1990</b> | <b>537</b> | <b>1235</b> | <b>1772</b> |

**Supplementary Table 2: Bayesian False-Discovery Probabilities for Ovarian Cancer GWAS SNPs in women of African ancestry**

| Subtype | Nearest Gene                  | SNP ID<br>(Effect / other allele) | OR<br>(95% CI)      | P-value                | BFDP <sub>1/1K</sub> | BFDP <sub>1/10K</sub> |
|---------|-------------------------------|-----------------------------------|---------------------|------------------------|----------------------|-----------------------|
| EOC     | <i>AKR1C3</i>                 | rs4525119 (T/C)                   | 0.70<br>(0.61-0.81) | 4.9 x 10 <sup>-7</sup> | 0.08                 | 0.49                  |
|         | <i>LOC101927394</i>           | rs7643459* (T/G)                  | 1.40<br>(1.22-1.60) | 8.4 x 10 <sup>-7</sup> | 0.05                 | 0.33                  |
|         | <i>UGT2A2</i>                 | rs4286604 (A/G)                   | 0.69<br>(0.59-0.80) | 8.5 x 10 <sup>-7</sup> | 0.05                 | 0.34                  |
|         | <i>WWC1</i>                   | rs142091544<br>(T/C)              | 3.22<br>(2.02-5.13) | 9.4 x 10 <sup>-7</sup> | 0.08                 | 0.47                  |
| HGSOC   | <i>FST</i>                    | rs37792 (G/A)                     | 0.65<br>(0.55-0.76) | 6.0 x 10 <sup>-8</sup> | 0.004                | 0.04                  |
|         | <i>MAGEC1</i>                 | rs57403204 (G/A)                  | 2.62<br>(1.83-3.76) | 1.7 x 10 <sup>-7</sup> | 0.01                 | 0.13                  |
|         | <i>LOC105376360</i>           | rs79079890 (G/T)                  | 3.20<br>(2.05-4.99) | 3.0 x 10 <sup>-7</sup> | 0.03                 | 0.25                  |
|         | <i>PRPSAP1</i>                | rs66459581<br>(A/AC)              | 1.63<br>(1.35-1.97) | 5.1 x 10 <sup>-7</sup> | 0.02                 | 0.19                  |
|         | <i>GABRG3</i>                 | rs116046250<br>(G/T)              | 2.95<br>(1.92-4.54) | 8.7 x 10 <sup>-7</sup> | 0.07                 | 0.44                  |
|         | <i>LOC105377300 /<br/>GK2</i> | rs192876988<br>(C/T)              | 3.01<br>(1.94-4.68) | 9.2 x 10 <sup>-7</sup> | 0.08                 | 0.47                  |

BFDP=Bayesian false-discovery probability; the subscripted number is the level of prior probability

**Supplementary Table 3:** Genes targeted for eQTL analysis within the region of ten EOC- and HGSOC-associated SNPs

| <b>Subtype</b> | <b>SNP ID</b> | <b>Build 37<br/>Chr:Pos</b> | <b>Nearest gene</b> | <b>Genes within 100kb</b>                               | <b>Genes at 100-500kb<sup>a</sup></b> |
|----------------|---------------|-----------------------------|---------------------|---------------------------------------------------------|---------------------------------------|
| <b>EOC</b>     | rs4525119     | 10:5091954                  | <i>AKR1C3</i>       | <i>AKR1C3, AKR1C1, AKR1C2</i>                           |                                       |
|                | rs7643459     | 3:8004828                   | <i>LOC101927394</i> | <i>LOC101927394</i>                                     |                                       |
|                | rs4286604     | 4:70442165                  | <i>UGT2A2</i>       | <i>UGT2B4, UGT2A2, UGT2A1</i>                           |                                       |
|                | rs142091544   | 5,167714000                 | <i>WWC1</i>         | <i>WWC1, TENM2</i>                                      |                                       |
| <b>HGSOC</b>   | rs37792       | 5:52644647                  | <i>FST</i>          |                                                         | <i>ITGA1, ITGA2, FST, NDUFS4</i>      |
|                | rs57403204    | X:141078552                 | <i>MAGEC1</i>       | <i>MAGEC1, MAGEC3</i>                                   |                                       |
|                | rs79079890    | 10:3684148                  | <i>LOC105376360</i> | <i>LOC105376360</i>                                     |                                       |
|                | rs66459581    | 17:74355264                 | <i>PRPSAP1</i>      | <i>PRPSAP1, UBALD2, QRICH2, U6, SPHK1, UBE2D, AANAT</i> |                                       |
|                | rs116046250   | 15:27231950                 | <i>GABRG3</i>       | <i>GABRG3, GABRB3, GABRA6, AK124673</i>                 |                                       |
|                | rs192876988   | 4:80297251                  | <i>GK2</i>          | <i>GK2, NAA11, LOC100505875</i>                         |                                       |

<sup>a</sup>Genes in the 100-500kb range are reported and considered in eQTL analysis only for variants with no genes within 100kb.

**Supplementary Table 4:** Summary of genetic association for selected SNPs identified in GWAS of EOC and HGSOC with breast cancer in African American individuals from the AABC study

| Nearest Gene                       | SNP ID<br>(Effect /<br>Other allele) | Build 37<br>Chr:Pos | EAF   | Breast cancer - all  |         | ER positive          |         | ER negative          |         |
|------------------------------------|--------------------------------------|---------------------|-------|----------------------|---------|----------------------|---------|----------------------|---------|
|                                    |                                      |                     |       | OR ( 95% CI)         | P-value | OR (95% CI)          | P-value | OR (95% CI)          | P-value |
| <i>AKR1C3</i>                      | rs4525119<br>(T/C)                   | 10:5091954          | 0.328 | 1.07<br>(0.99,1.16)  | 0.098   | 1.02<br>(0.93,1.13)  | 0.621   | 1.11<br>(1.00,1.24)  | 0.058   |
| <i>LOC101927394</i>                | rs7643459<br>(T/G)                   | 3:8004828           | 0.377 | 1.05<br>(0.97,1.13)  | 0.232   | 1.02<br>(0.93,1.12)  | 0.622   | 1.13<br>(1.01,1.26)  | 0.029   |
| <i>UGT2A2</i>                      | rs4286604<br>(A/G)                   | 4:70442165          | 0.279 | 0.94<br>(0.86,1.02)  | 0.142   | 0.93<br>(0.84, 1.04) | 0.205   | 0.96<br>(0.85,1.09)  | 0.551   |
| <i>WWC1</i>                        | rs142091544<br>(T/C)                 | 5:167714000         | 0.040 | 1.07<br>(0.87, 1.31) | 0.530   | 0.87<br>(0.67, 1.14) | 0.314   | 1.55<br>(1.19, 2.02) | 0.001   |
| <i>FST</i>                         | rs37792<br>(G/A)                     | 5:52644647          | 0.341 | 0.96<br>(0.89, 1.04) | 0.424   | 0.97<br>(0.88,1.07)  | 0.578   | 0.97<br>(0.87, 1.09) | 0.621   |
| <i>MAGEC1</i>                      | rs57403204<br>(G/A)                  | X:141078552         | 0.051 | 0.93<br>(0.77, 1.12) | 0.424   | 0.89<br>(0.71, 1.12) | 0.329   | 0.97<br>(0.74, 1.25) | 0.813   |
| <i>LOC105376360</i>                | rs79079890<br>(G/T)                  | 10:3684148          | 0.035 | 1.22<br>(0.99,1.50)  | 0.066   | 1.21<br>(0.95,1.55)  | 0.125   | 1.12<br>(0.83,1.52)  | 0.449   |
| <i>PRPSAP1</i>                     | rs66459581<br>(A/AC)                 | 17:74355264         | 0.228 | 1.01<br>(0.92,1.10)  | 0.890   | 0.89<br>(0.80,1.00)  | 0.054   | 1.12<br>(0.99,1.28)  | 0.081   |
| <i>GABRG3</i>                      | rs116046250<br>(G/T)                 | 15:27231950         | 0.045 | 0.87<br>(0.71,1.06)  | 0.176   | 0.88<br>(0.69,1.12)  | 0.306   | 0.83<br>(0.62,1.10)  | 0.195   |
| <i>LOC105377300</i><br><i>/GK2</i> | rs192876988<br>(C/T)                 | 4:80297251          | 0.040 | 1.19<br>(0.96,1.47)  | 0.105   | 1.32<br>(1.03,1.69)  | 0.027   | 1.02<br>(0.75,1.39)  | 0.883   |

SNP: single nucleotide polymorphism; EAF: effect allele frequency; OR: odds ratio; CI: confidence interval

**Supplementary Table 5:** Summary of genetic association for selected SNPs identified in GWAS of EOC and HGSOC with prostate cancer in African American individuals from the AAPC study

| Nearest Gene                        | SNP ID<br>(Effect /<br>Other allele) | Build 37<br>Chr:Pos | EAF   | OR (95% CI)       | P-value |
|-------------------------------------|--------------------------------------|---------------------|-------|-------------------|---------|
| <i>AKR1C3</i>                       | rs4525119<br>(T/C)                   | 10:5091954          | 0.328 | 1.03 (0.97, 1.10) | 0.304   |
| <i>LOC101927394</i>                 | rs7643459<br>(T/G)                   | 3:8004828           | 0.371 | 1.07 (1.01, 1.13) | 0.034   |
| <i>UGT2A2</i>                       | rs4286604<br>(A/G)                   | 4:70442165          | 0.264 | 1.08 (1.01, 1.15) | 0.025   |
| <i>WWC1</i>                         | rs142091544<br>(T/C)                 | 5:167714000         | 0.036 | 1.11 (0.94, 1.32) | 0.197   |
| <i>FST</i>                          | rs37792<br>(G/A)                     | 5:52644647          | 0.325 | 0.99 (0.93, 1.03) | 0.685   |
| <i>MAGEC1</i>                       | rs57403204<br>(G/A)                  | X:141078552         | 0.056 | 0.98 (0.89, 1.09) | 0.754   |
| <i>LOC105376360</i>                 | rs79079890<br>(G/T)                  | 10:3684148          | 0.037 | 0.96 (0.82, 1.13) | 0.646   |
| <i>PRPSAP1</i>                      | rs66459581<br>(A/AC)                 | 17:74355264         | 0.230 | 1.03 (0.96, 1.11) | 0.363   |
| <i>GABRG3</i>                       | rs116046250<br>(G/T)                 | 15:27231950         | 0.042 | 0.93 (0.80, 1.08) | 0.365   |
| <i>LOC105377300</i><br><i>/ GK2</i> | rs192876988<br>(C/T)                 | 4:80297251          | 0.043 | 0.95 (0.81, 1.12) | 0.567   |

SNP: single nucleotide polymorphism; EAF: effect allele frequency; OR: odds ratio; CI: confidence interval

**Supplementary Table 6:** Summary of results for fine mapping in African ancestry women of loci previously identified in GWAS of European ancestry women

| Locus                                                                     | SNP ID      | Build 37<br>Chr:Pos | Nearest Gene               | Phenotype               | EOC                          |                                      |                           | HGSC <sup>a</sup>            |                                      |                           |
|---------------------------------------------------------------------------|-------------|---------------------|----------------------------|-------------------------|------------------------------|--------------------------------------|---------------------------|------------------------------|--------------------------------------|---------------------------|
|                                                                           |             |                     |                            |                         | Number<br>of SNPs<br>Plotted | Minimum SNP<br>position in<br>region | Minimum<br>SNP<br>P-value | Number<br>of SNPs<br>Plotted | Minimum SNP<br>position in<br>region | Minimum<br>SNP<br>P-value |
| <b>Confirmed SNPs in European ancestry OncoArray meta-analysis</b>        |             |                     |                            |                         |                              |                                      |                           |                              |                                      |                           |
| 1p34.3                                                                    | rs58722170  | 1:38096421          | <i>RSP01</i>               | Serous                  | 3078                         | chr1:37917469                        | 2.91E-04                  | 2685                         | chr1:37917469                        | 3.38E-04                  |
| 2q14.1                                                                    | rs752590    | 2:113972945         | <i>PAX8</i>                | Mucinous                | 3615                         | chr2:114298849                       | 2.31E-03                  | --                           | --                                   | --                        |
| 2q31.1                                                                    | rs711830    | 2:177037311         | <i>HOXD3</i>               | Mucinous                | 3171                         | chr2:1177037311                      | 2.23E-03                  | --                           | --                                   | --                        |
| 2q31.1                                                                    | rs6755777   | 2:177043226         | <i>HAGLR</i>               | Serous                  | 3175                         | chr2:177326682                       | 2.23E-03                  | 2775                         | chr2:177442640                       | 2.49E-03                  |
| 3q25.31                                                                   | rs62274041  | 3:156435640         | <i>TIPARP</i>              | HGSC                    | 3204                         | chr3:156252180                       | 2.01E-03                  | 2863                         | chr3:156204177                       | 2.37E-03                  |
| 5p15.33                                                                   | rs10069690  | 5:1279790           | <i>TERT</i>                | Serous                  | 5037                         | chr5:949207                          | 9.57E-04                  | 4497                         | chr5:892204                          | 7.97E-04                  |
| 5p15.33                                                                   | rs7705526   | 5:1285974           | <i>TERT</i>                | Serous borderline       | 5005                         | chr5:949207                          | 9.57E-04                  | 4464                         | chr5:892204                          | 7.97E-04                  |
| 8q21.13                                                                   | rs76837345  | 8:82668818          | <i>CHMP4C</i>              | HGSC                    | 4045                         | chr8:82866267                        | 1.44E-05 <sup>c</sup>     | 3523                         | chr8:82866267                        | 3.98E-06 <sup>b</sup>     |
| 8q24.21                                                                   | rs1400482   | 8:128529685         | <i>LINC00824</i>           | Serous                  | 4414                         | chr8:128619531                       | 3.51E-04                  | 3897                         | chr8:128762529                       | 1.86E-03                  |
| 9p22.2                                                                    | rs10962692  | 9:16915874          | <i>BNC2</i>                | HGSC                    | 5248                         | chr9:16978052                        | 2.67E-05 <sup>c</sup>     | 4746                         | chr9:16986321                        | 5.57E-05                  |
| 9q34.2                                                                    | rs8176685   | 9:136138766         | <i>ABO</i>                 | HGSC                    | 3968                         | chr9:136075407                       | 5.07E-04                  | 3472                         | chr9:136267149                       | 3.17E-04                  |
| 10p12.31                                                                  | rs144962376 | 10:21878832         | <i>MLLT10</i>              | Serous                  | 2514                         | chr10:21978590                       | 4.13E-03                  | 2162                         | chr10:22035324                       | 7.73E-03                  |
| 17q12                                                                     | rs7405776   | 17:36093022         | <i>HNF1B</i>               | Serous                  | 2787                         | chr17:36195231                       | 5.44E-03                  | 2324                         | chr17:36113300                       | 7.82E-04                  |
| 17q12                                                                     | rs11651755  | 17:36099840         | <i>HNF1B</i>               | Clear cell              | 2778                         | chr17:36195231                       | 5.44E-03                  | --                           | --                                   | --                        |
| 17q21.31                                                                  | rs7207826   | 17:46500673         | <i>SKAP1</i>               | Serous                  | 2827                         | chr17:46807761                       | 6.43E-04                  | 2572                         | chr17:46215732                       | 8.18E-04                  |
| 17q21.32                                                                  | rs1879586   | 17:43567337         | <i>PLEKHM1</i>             | HGSC                    | 3735                         | chr17:43954416                       | 1.31E-04                  | 3370                         | chr17:43945726                       | 1.44E-04                  |
| 19p13.11                                                                  | rs4808075   | 19:17390291         | <i>BABAM1</i>              | HGSC                    | 9100                         | chr19:17395213                       | 1.77E-04                  | 4077                         | chr19:17088458                       | 3.07E-04                  |
| 19q11.21                                                                  | rs688187    | 19:39732752         | <i>IFNL3</i>               | Mucinous                | 8360                         | chr19:39684764                       | 1.21E-04                  | --                           | --                                   | --                        |
| <b>Newly identified SNPs in European ancestry OncoArray meta-analysis</b> |             |                     |                            |                         |                              |                                      |                           |                              |                                      |                           |
| 2q13                                                                      | rs2165109   | 2:111818658         | <i>ACOXL</i>               | HGSC                    | 2172                         | chr2:111595642                       | 6.87E-03                  | 1951                         | chr2:111832215                       | 1.47E-02                  |
| 3q22.3                                                                    | rs112071820 | 3:138849110         | <i>BPESC1</i>              | Mucinous                | 2922                         | chr3:138839642                       | 3.34E-05 <sup>c</sup>     | --                           | --                                   | --                        |
| 3q28                                                                      | rs9870207   | 3:190525516         | <i>GMNC</i>                | Serous borderline, LGSC | 4647                         | chr3:190657915                       | 3.73E-03                  | 4081                         | chr3:190839089                       | 3.34E-03                  |
| 4q32.2                                                                    | rs13113999  | 4:167187046         | <i>TLL1</i>                | Serous borderline       | 4879                         | chr4:167492545                       | 4.71E-03                  | 4252                         | chr4:166876033                       | 8.01E-04                  |
| 5q12.3                                                                    | rs555025179 | 5:66121089          | <i>MAST4</i>               | Endometrioid            | 3720                         | chr5:65907851                        | 5.91E-03                  | --                           | --                                   | --                        |
| 8q21.11                                                                   | rs150293538 | 8:77320354          | <i>LINC01111</i>           | Serous borderline, LGSC | 3305                         | chr8:77354021                        | 1.17E-04                  | 2883                         | chr8:77320354                        | 2.01E-04                  |
| 8q24.21                                                                   | rs9886651   | 8:128817883         | <i>PVT1</i>                | HGSC                    | 4449                         | chr8:129036159                       | 2.67E-04                  | 3962                         | chr8:129093793                       | 1.52E-03                  |
| 9q31.1                                                                    | rs320203    | 9:104943226         | <i>LOC105376188</i>        | Mucinous                | 4927                         | chr9:105237170                       | 1.49E-03                  | --                           | --                                   | --                        |
| 10q24.33                                                                  | rs7902587   | 10:105694301        | <i>LOC102724351</i>        | Serous borderline, LGSC | 3192                         | chr10:105375295                      | 3.40E-05 <sup>c</sup>     | 2852                         | chr10:105300054                      | 1.03E-03                  |
| 12q24.31                                                                  | rs7953249   | 12:121403724        | <i>HNF1A-AS1</i>           | HGSC                    | 3680                         | chr12:121113096                      | 6.90E-05                  | 3272                         | chr12:121113096                      | 2.51E-05 <sup>c</sup>     |
| 18q11.2                                                                   | rs8098244   | 18:21405553         | <i>LAMA3</i>               | Serous borderline, LGSC | 2685                         | chr18:21555816                       | 1.84E-05 <sup>b</sup>     | 2431                         | chr18:21555816                       | 6.19E-05                  |
| 22q12.1                                                                   | rs6005807   | 22:28934313         | <i>TTC28/ LOC101929594</i> | HGSC                    | 2513                         | chr22:29126617                       | 1.27E-02                  | 2066                         | chr22:29073209                       | 1.56E-02                  |

EOC: epithelial ovarian cancer; HGSC: high-grade serous ovarian cancer; SNP: single nucleotide polymorphism; Chr: chromosome; Pos: position; LGSC: low-grade serous ovarian cancer.

<sup>a</sup>Fine mapping among HGSC was completed only for those SNPs associated with serous ovarian cancer.

<sup>b</sup>Significant at the Bonferroni threshold (0.05/number of SNPs plotted).

<sup>c</sup>Significant at the suggestive threshold (0.05/(number of SNPs plotted/3)).

**Supplementary Table 7:** Summary of results for fine mapping in European ancestry women of loci identified in our GWAS of African ancestry women

| Gene                    | SNP ID      | Build 37<br>Chr:Pos | EOC                          |                                      |                       | HGSOC                        |                                      |                    |
|-------------------------|-------------|---------------------|------------------------------|--------------------------------------|-----------------------|------------------------------|--------------------------------------|--------------------|
|                         |             |                     | Number<br>of SNPs<br>plotted | Minimum SNP<br>position in<br>region | Min SNP<br>p-value    | Number<br>of SNPs<br>plotted | Minimum SNP<br>position in<br>region | Min SNP<br>p-value |
| <i>AKR1C3</i>           | rs4525119   | 10:5091954          | 6105                         | chr10:5341275                        | 2.44E-03              | --                           | --                                   | --                 |
| <i>LOC101927394</i>     | rs7643459   | 3:8004828           | 5466                         | chr3:8268351                         | 1.12E-03              | --                           | --                                   | --                 |
| <i>UGT2A2</i>           | rs4286604   | 4:70442165          | 5542                         | chr4:70592790                        | 1.14E-05 <sup>a</sup> | --                           | --                                   | --                 |
| <i>WWC1</i>             | rs142091544 | 5:167714000         | 3761                         | chr5:167857657                       | 1.74E-04              | --                           | --                                   | --                 |
| <i>FST</i>              | rs37792     | 5:52644647          | --                           | --                                   | --                    | 4416                         | chr5:52332701                        | 3.94E-05           |
| <i>MAGEC1</i>           | rs57403204  | X:141078552         | --                           | --                                   | --                    | 3389                         | chrX:141078552                       | 1.78E-04           |
| <i>LOC105376360</i>     | rs79079890  | 10:3684148          | --                           | --                                   | --                    | 4899                         | chr10:3463140                        | 2.24E-04           |
| <i>PRPSAP1</i>          | rs66459581  | 17:74355264         | --                           | --                                   | --                    | 4025                         | chr17:74420211                       | 3.74E-04           |
| <i>GABRG3</i>           | rs116046250 | 15:27231950         | --                           | --                                   | --                    | 3885                         | chr15:27240688                       | 5.16E-04           |
| <i>LOC105377300/GK2</i> | rs192876988 | 4:80297251          | --                           | --                                   | --                    | 3443                         | chr4:80297251                        | 5.76E-04           |

<sup>a</sup>Significant at the suggestive threshold (0.05/(number of SNPs plotted/3)).



(a)

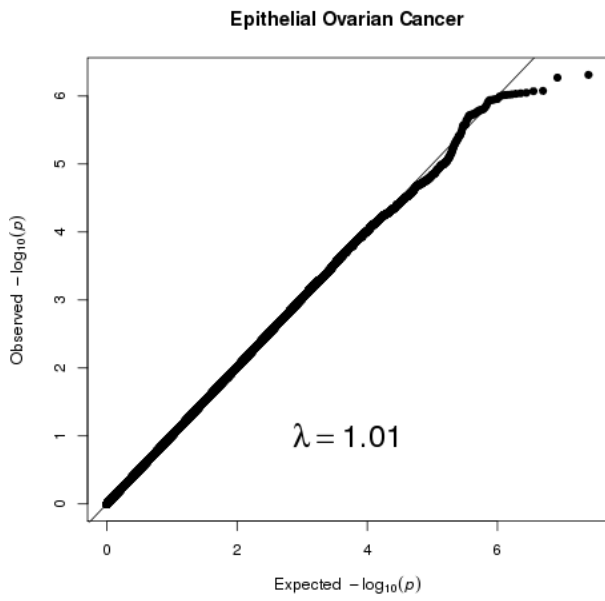

(b)

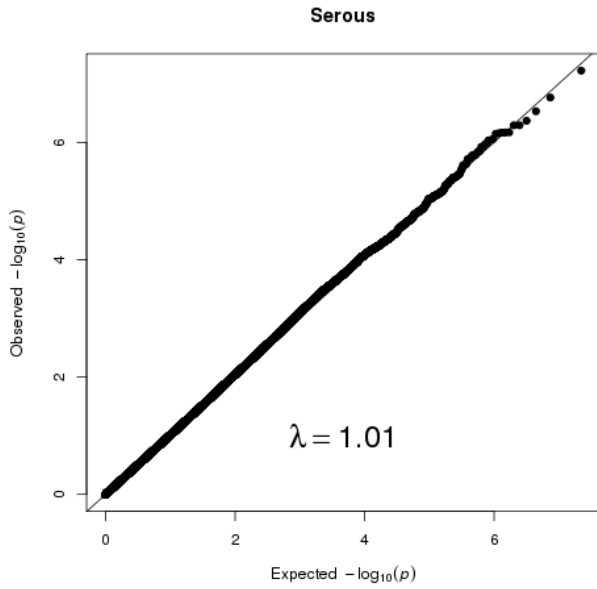

(a)

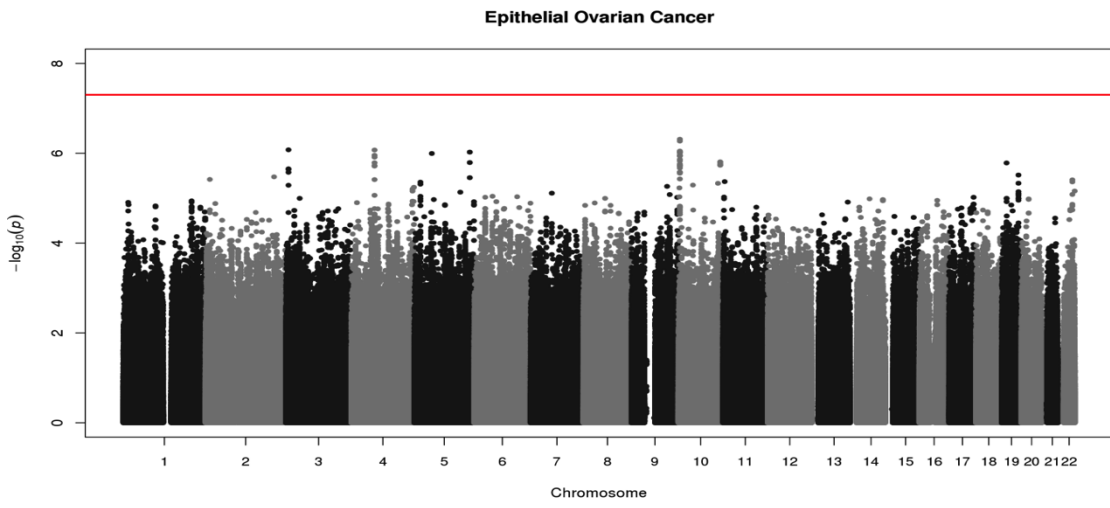

(b)

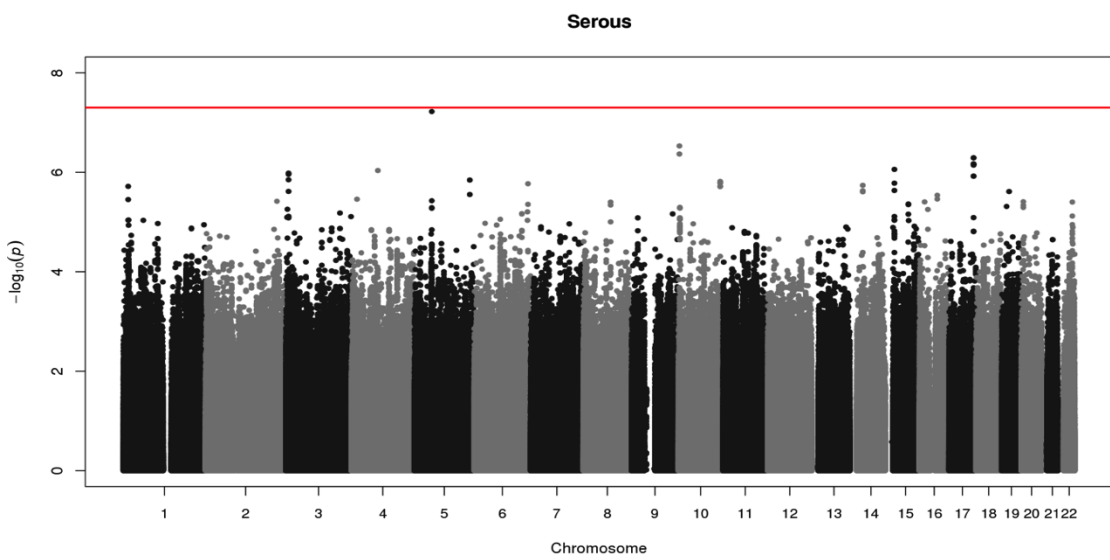

Manichaikul et al., Supplementary Figure 2

(a)

### Epithelial Ovarian Cancer

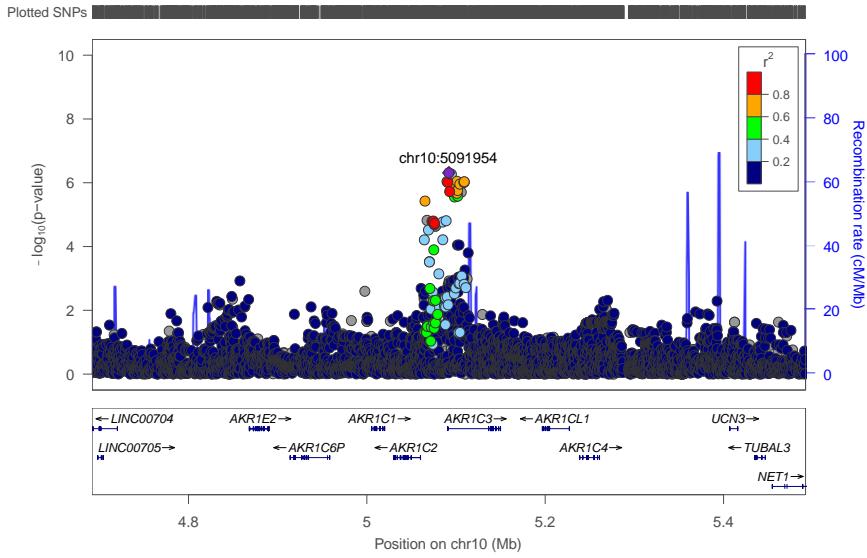

(b)

### Epithelial Ovarian Cancer

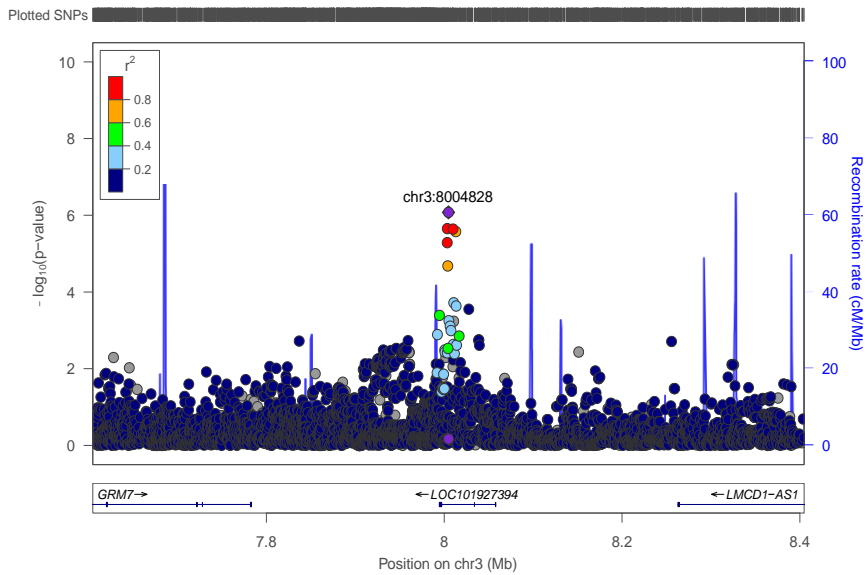

(c)

### Epithelial Ovarian Cancer

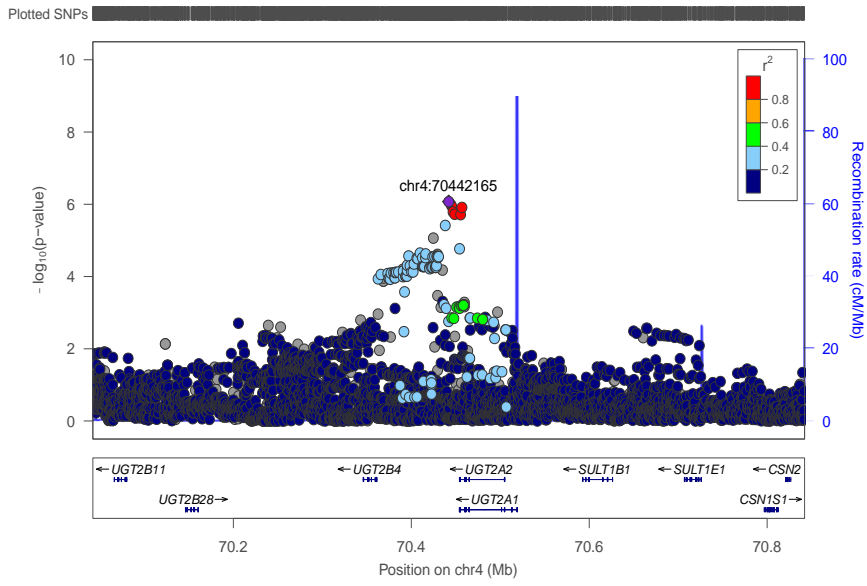

(d)

### Epithelial Ovarian Cancer

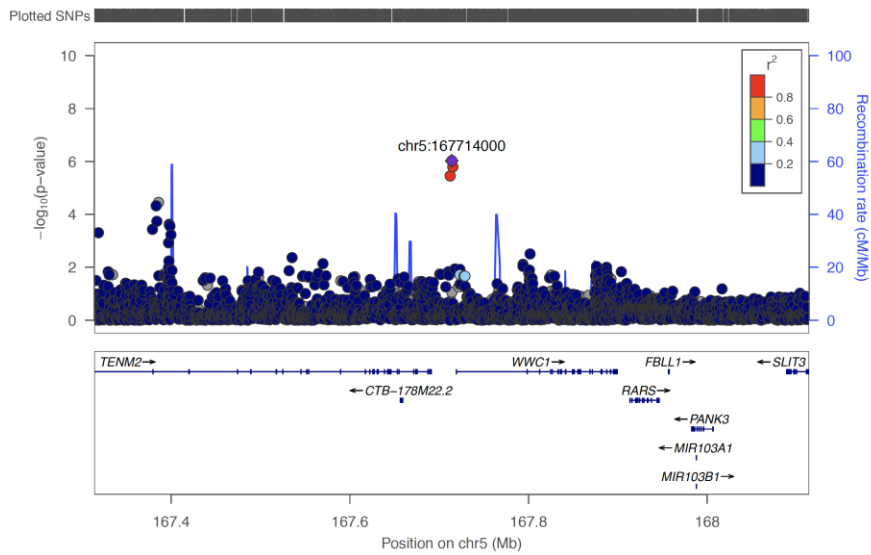

Manichaikul et al., Supplementary Figure 3

(a)

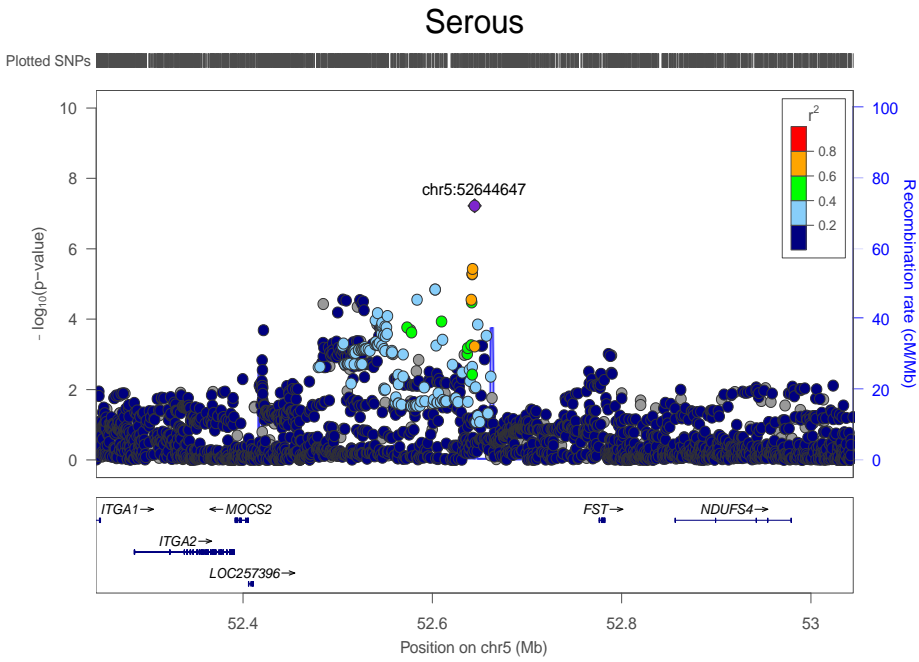

(b)

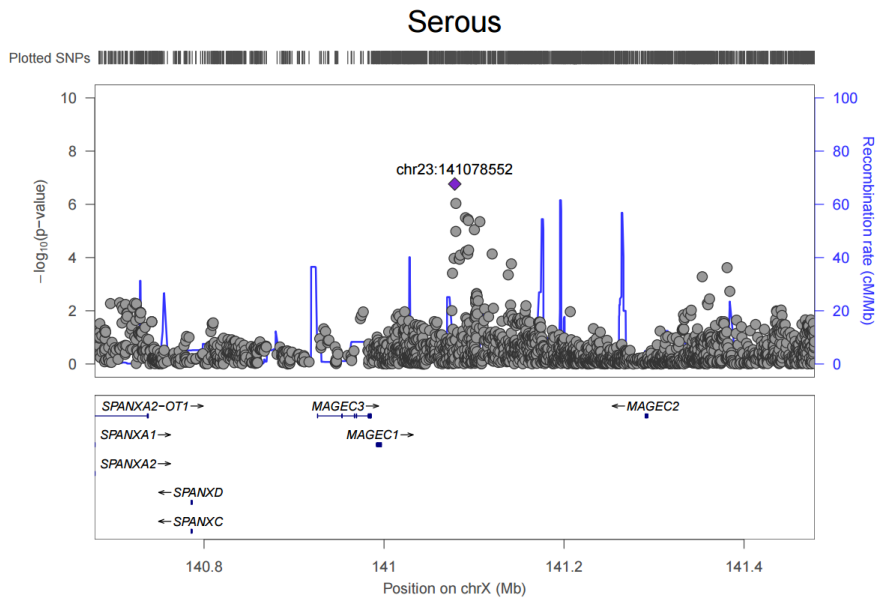

(c)

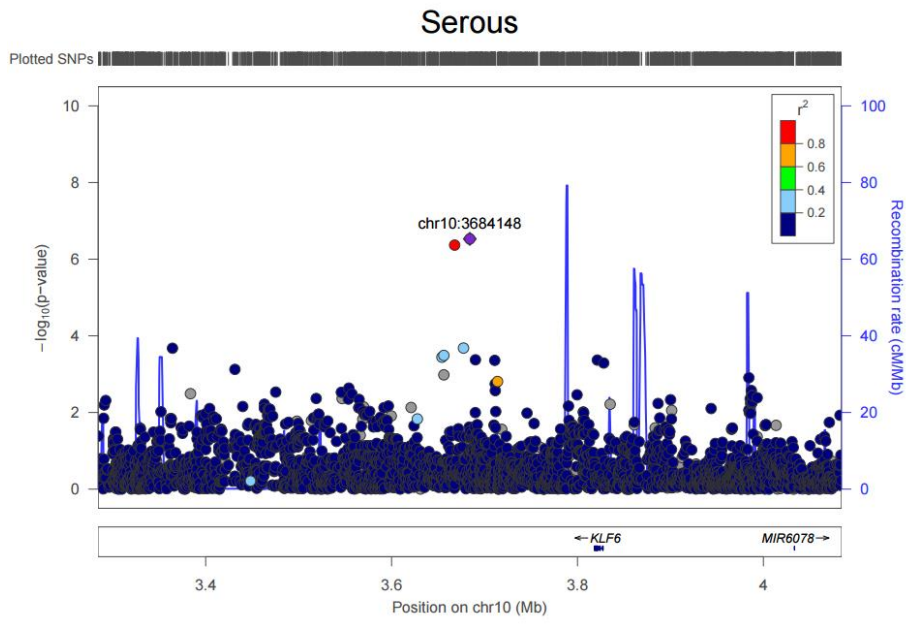

(d)

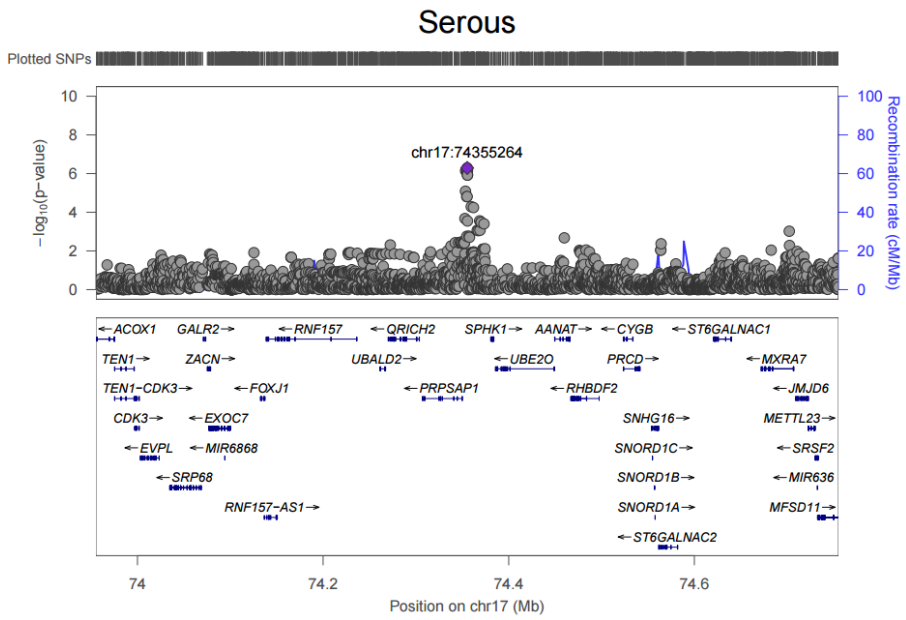

(e)

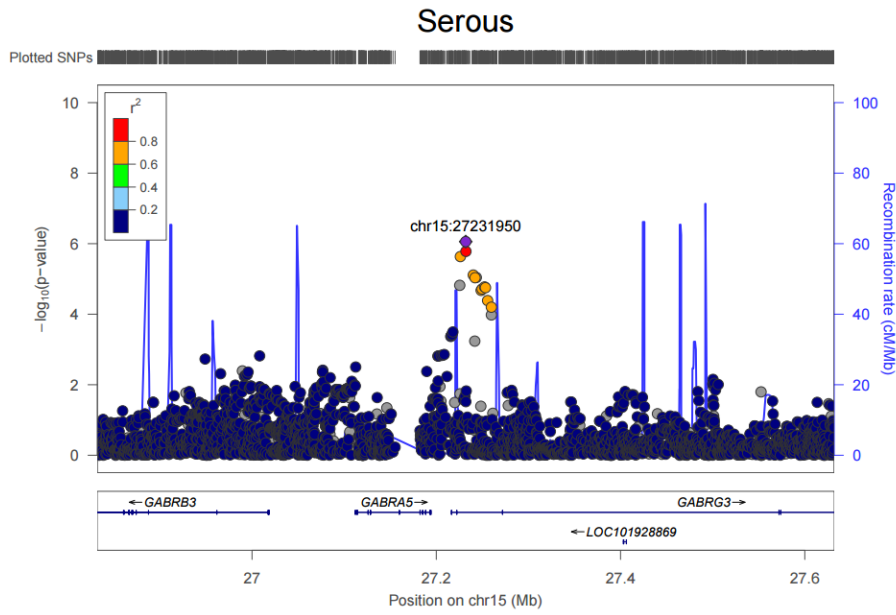

(f)

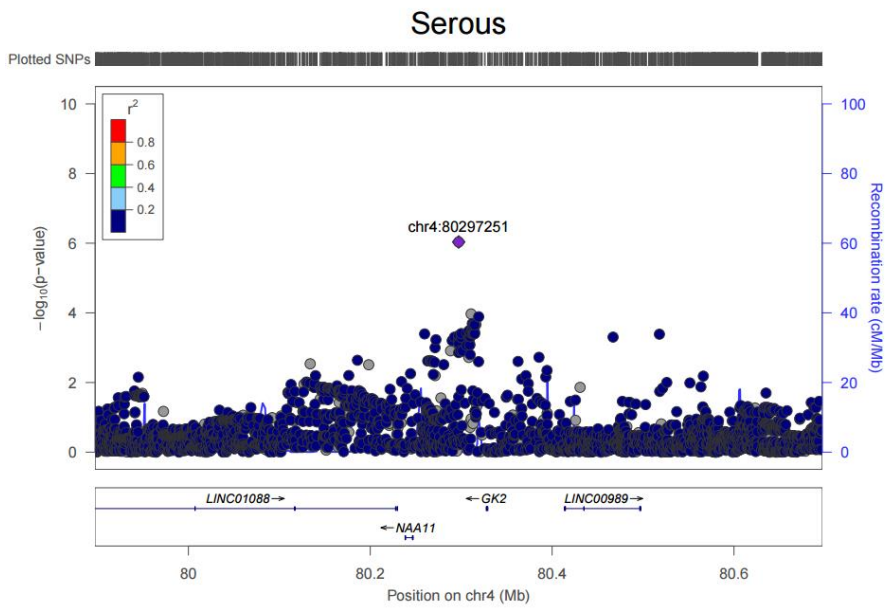

Manichaikul et al., Supplementary Figure 4

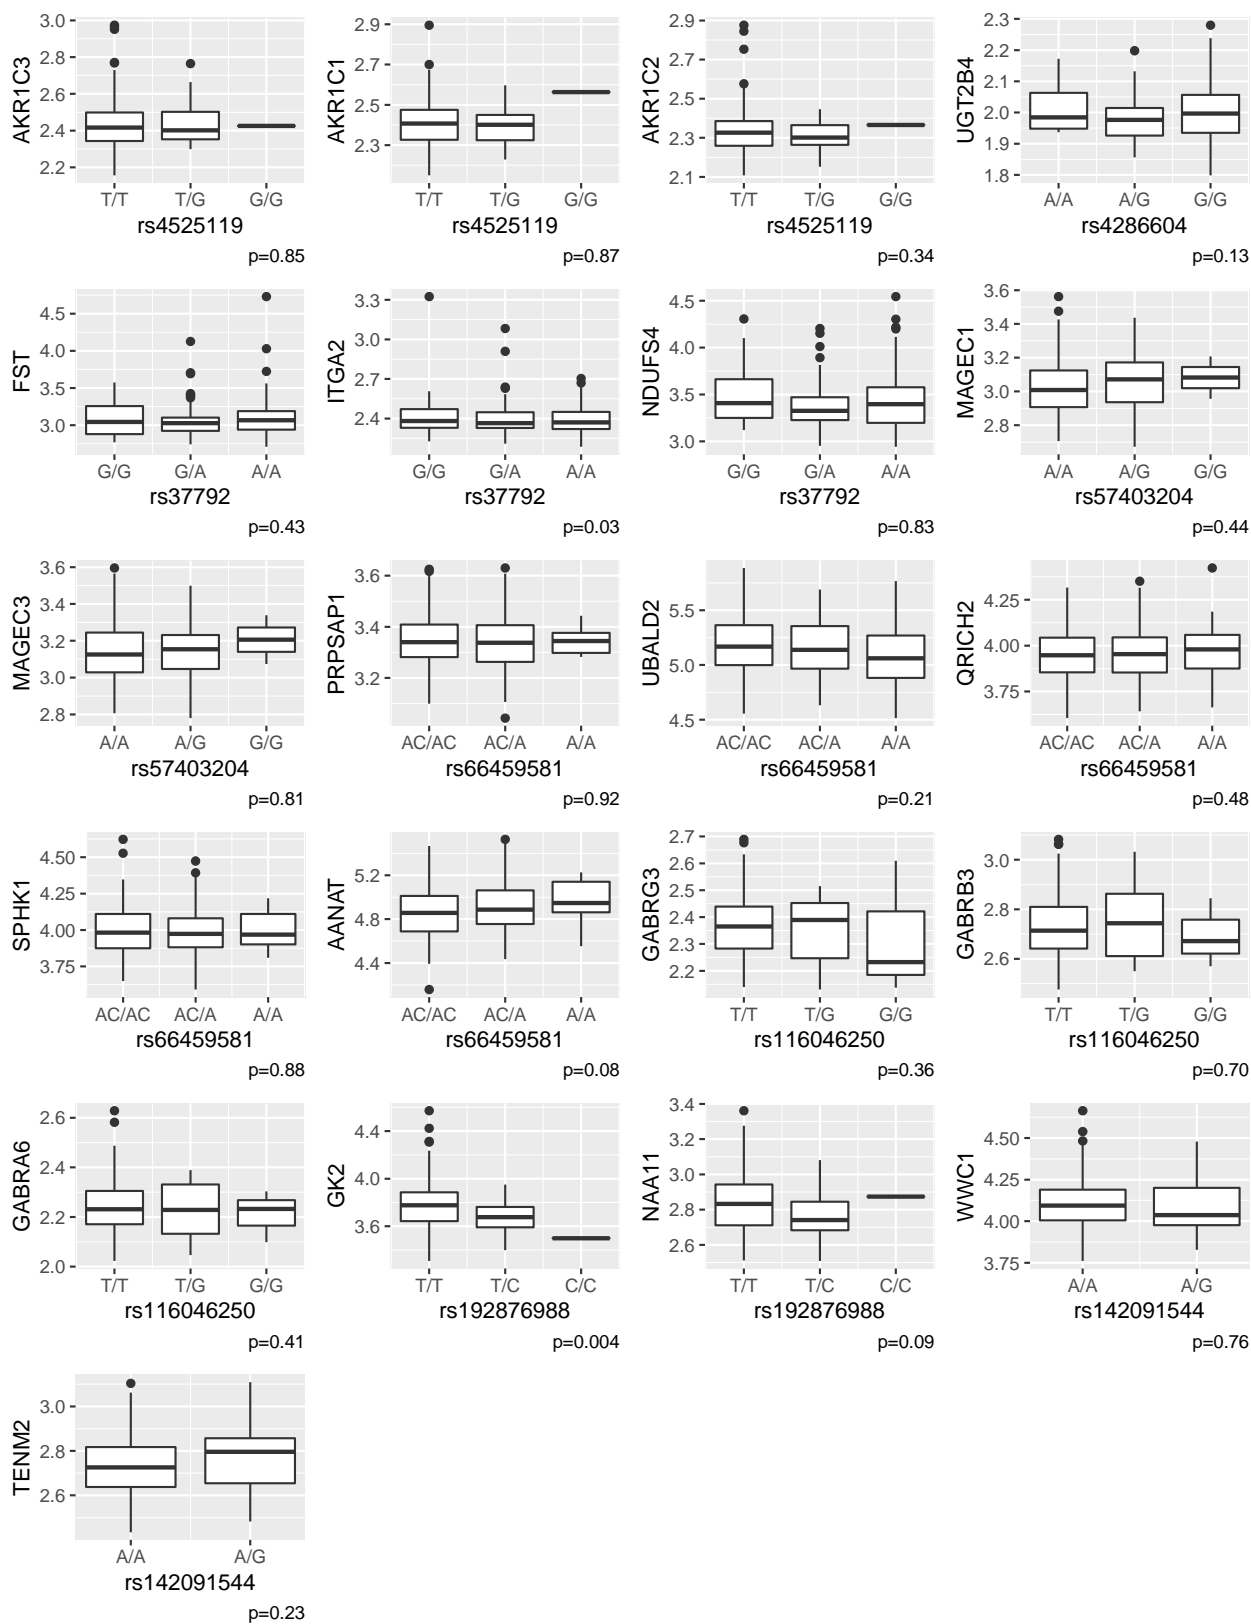

Manichaikul et al., Supplementary Figure 5
